# Supplementary material for: Systemic lupus erythematosus dysregulates the expression of long noncoding RNAs in placentas
Source: Arthritis Res Ther. 2022 Jun 14;24:142. doi: 10.1186/s13075-022-02825-7 (PMC9195362; doi:10.1186/s13075-022-02825-7)
Supplement: Supplementary file 1 — Additional file 1: Table S1. Clinical manifestations and laboratory records. [file 13075_2022_2825_MOESM1_ESM.xlsx]

## Sheet: Table S1
Table S1 Clinical manifestations and laboratory records
Patient #	Age	C-section	BMI	Disease duration (month)	SLEDAI score	Gestation age (weeks)	Fetal sex	Fetal weight (gram)	Fetal weight <10 percentile	ANA	dsDNA	SSA	ApL	Preecplamsia	Proteinuria	Hypocomplementemia	Aspirin	Steroids	Immunosuppressive drugs	RNA-seq	QPCR
SLE-1	26	YES	24.7475	10	5	38.4286	MALE	3300	NO	+	+	-	-	NO	NO	YES	NO	YES	NO	YES	YES
SLE-2	28	NO	23.03	45	3	38.4286	MALE	2900	NO	+	-	-	+	NO	NO	YES	YES	YES	NO	YES	YES
SLE-3	28	NO	25.721	10	4	39.7143	MALE	2400	YES	+	-	-	-	NO	YES	NO	NO	YES	NO	YES	NO
SLE-4	32	NO	25	11	2	38.5714	MALE	3300	NO	+	-	-	+	NO	NO	YES	YES	YES	NO	YES	YES
SLE-5	28	NO	25.7812	70	0	39.5714	MALE	3850	NO	+	-	+	-	NO	NO	NO	NO	YES	NO	YES	NO
SLE-6	30	NO	23.8281	20	0	39.5714	MALE	2850	NO	+	-	-	-	NO	NO	NO	NO	YES	NO	NO	YES
SLE-7	36	YES	30.4438	95	6	37	FEMALE	2600	NO	+	+	-	-	NO	YES	NO	NO	YES	NO	YES	YES
SLE-8	32	NO	32.2581	107	0	37.2857	FEMALE	3150	NO	+	-	-	-	NO	NO	NO	NO	YES	NO	YES	YES
SLE-9	28	NO	24.4646	167	4	34.8571	FEMALE	2150	NO	+	-	-	+	NO	YES	NO	YES	YES	NO	YES	YES
SLE-10	35	NO	31.6032	35	0	38.7143	FEMALE	3000	NO	+	-	-	-	NO	NO	NO	NO	YES	NO	NO	YES
NT-1	32	YES	30.2436	NA	NA	39.8571	MALE	3630	NO	NA	NA	NA	NA	NA	NA	NA	NA	NA	NA	YES	YES
NT-2	32	NO	21.8314	NA	NA	38.8571	MALE	3440	NO	NA	NA	NA	NA	NA	NA	NA	NA	NA	NA	YES	YES
NT-3	29	NO	30.8185	NA	NA	40	MALE	3125	NO	NA	NA	NA	NA	NA	NA	NA	NA	NA	NA	YES	NO
NT-4	28	NO	24.8163	NA	NA	39.5714	MALE	3640	NO	NA	NA	NA	NA	NA	NA	NA	NA	NA	NA	YES	YES
NT-5	30	NO	32.6608	NA	NA	38.7143	MALE	2895	NO	NA	NA	NA	NA	NA	NA	NA	NA	NA	NA	YES	YES
NT-6	30	YES	29.3575	NA	NA	38.5714	FEMALE	3365	NO	NA	NA	NA	NA	NA	NA	NA	NA	NA	NA	YES	YES
NT-7	30	NO	25.9645	NA	NA	40.1429	FEMALE	3730	NO	NA	NA	NA	NA	NA	NA	NA	NA	NA	NA	YES	NO
NT-8	33	NO	22.2063	NA	NA	38.5714	FEMALE	3200	NO	NA	NA	NA	NA	NA	NA	NA	NA	NA	NA	YES	YES
NT-9	31	NO	27.6398	NA	NA	38.7143	FEMALE	3500	NO	NA	NA	NA	NA	NA	NA	NA	NA	NA	NA	NO	YES
NT-10	33	NO	28.3203	NA	NA	39.4286	FEMALE	3260	NO	NA	NA	NA	NA	NA	NA	NA	NA	NA	NA	NO	YES
