# Supplementary material for: Systemic lupus erythematosus dysregulates the expression of long noncoding RNAs in placentas
Source: Arthritis Res Ther. 2022 Jun 14;24:142. doi: 10.1186/s13075-022-02825-7 (PMC9195362; doi:10.1186/s13075-022-02825-7)
Supplement: Supplementary file 10 — Additional file 10: Table S7. CIBERSORTx analysis. [file 13075_2022_2825_MOESM10_ESM.xlsx]

## Sheet: CIBERSORTx analysis
Table S7. CIBERSORTx analysis
Mixture	B cells naive	B cells memory	Plasma cells	T cells CD8	T cells CD4 naive	T cells CD4 memory resting	T cells CD4 memory activated	T cells follicular helper	T cells regulatory (Tregs)	T cells gamma delta	NK cells resting	NK cells activated	Monocytes	Macrophages M0	Macrophages M1	Macrophages M2	Dendritic cells resting	Dendritic cells activated	Mast cells resting	Mast cells activated	Eosinophils	Neutrophils	P-value	Correlation	RMSE
SLE_1	0	0	0.0367948	0	0	0.150955	0	0	0	0.00641705	0	0.0475275	0.0447996	0	0.0186272	0.297807	0.148554	0	0	0.028161	0.155528	0.0648296	0.54	-0.00857642	1.08651
SLE_2	0	0.0600021	0.0226966	0	0	0.191263	0	0	0	0	0.00302778	0.0185484	0.0158109	0	0.00511209	0.414763	0	0.00290413	0.0903436	0	0.0815405	0.0939882	0.67	-0.0175426	1.09213
SLE_3	0	0	0.0978969	0	0	0.116081	0	0	0.0190038	0	0	0.0435709	0.250141	0	0.0486656	0.281435	0	0	0.0339025	0	0.0459129	0.0633902	0.5	-0.00411607	1.09076
SLE_4	0	0	0.099229	0	0	0.209915	0	0.0124212	0	0.0047812	0	0.0665287	0.0276278	0	0.0765519	0.276509	0.134585	0	0	0.0152057	0.042868	0.0337782	0.43	0.00728926	1.0732
SLE_5	0	0	0.0796161	0	0	0.223628	0	0	0	0	0.0284967	0	0.0552278	0	0.0361149	0.266019	0.0249265	0.0500207	0	0.0542341	0.06032	0.121396	0.32	0.0235794	1.06942
SLE_6	0.0133756	0	0.0752648	0	0	0.145128	0	0	0.0106032	0	0.0133354	0.00549971	0	0	0.046343	0.438373	0.0606359	0	0.039467	0	0.0869477	0.0650268	0.48	0.000554001	1.08702
SLE_7	0	0.0053959	0.0152518	0	0	0.260294	0	0.0118906	0	0	0	0.0744145	0.117406	0	0.0381079	0.200005	0.0566583	0.036017	0	0.0197342	0.0669283	0.0978973	0.48	0.00147285	1.08231
SLE_8	0	0	0.0513237	0	0	0.170146	0	0.00232963	0	0	0.0435938	0.00338849	0.0384106	0	0.0395343	0.395955	0	0.0538957	0.0852746	0	0.0444865	0.0716616	0.34	0.0204008	1.07187
NT_1	0	0	0.0728573	0	0	0.171273	0	0	0	0	0.0150431	0.00360699	0.0961875	0	0.0427125	0.363115	0	0	0.0886208	0	0.0597894	0.0867945	0.38	0.0127077	1.07689
NT_2	0	0	0.0889254	0	0	0.253262	0.0021922	0	0	0	0	0.0426331	0.0821256	0	0.0112566	0.2886	0	0	0.127821	0	0.0125949	0.0905898	0.67	-0.0166358	1.08111
NT_3	0	0	0.0129677	0	0	0.156486	0	0.0269814	0.00254797	0.00628354	0	0.0506595	0.180751	0.0451618	0.0314688	0.0735892	0.0417508	0	0.0957418	0	0.0928438	0.182766	0.38	0.0125318	1.09318
NT_4	0.00214168	0	0.0931008	0	0	0.112351	0	0	0.0118845	0	0	0.0544886	0.0599034	0	0.00223752	0.363464	0	0.00494977	0.138231	0	0.0859777	0.0712697	0.77	-0.0263804	1.09026
NT_5	0	0.0944763	0.0304393	0	0	0.234125	0	0	0	0	0.0818063	0	0.170915	0	0.0133741	0.267325	0	0.00193153	0.0253749	0	0	0.0802315	0.71	-0.0204365	1.08913
NT_6	0	0.0136209	0.0384848	0	0	0.262325	0.000553206	0	0	0	0.0408594	0.0194636	0.104947	0	0.116984	0.285341	0	0	0.0394986	0	0.0239611	0.0539611	0.29	0.0268972	1.07269
NT_7	0	0	0.0549504	0	0	0.192998	0	0	0	0	0	0.0606697	0.105755	0	0.0368706	0.381488	0	0	0.0726804	0	0.060887	0.0337006	0.66	-0.0154495	1.08627
NT_8	0.00853226	0	0.0898035	0	0.0155822	0.0649718	0	0	0.0347263	0.00522089	0	0.0317523	0.189628	0	0.0247342	0.360975	0	0	0.0256593	0	0.0290746	0.11934	0.6	-0.0120752	1.10495
